# Supplementary material for: Degenerative and Regenerative Actin Cytoskeleton Rearrangements, Cell Death, and Paradoxical Proliferation in the Gills of Pearl Gourami (Trichogaster leerii) Exposed to Suspended Soot Microparticles
Source: MDPI journal article supplement (doi:10.3390/ijms242015146), 2023-10-13
Supplement: s1 [file s1]

**Supplementary Table 1.** Elemental composition and PAH content in soot microparticles used in experiment.

| Method of analysis                                                                  | Soot microparticle components    | Content (%) |
|-------------------------------------------------------------------------------------|----------------------------------|-------------|
| <b>Trace element energy-dispersive analysis (EDAX) data (elemental composition)</b> | carbon (C)                       | 67          |
|                                                                                     | oxygen (O)                       | 14          |
|                                                                                     | calcium (Ca)                     | 4           |
|                                                                                     | potassium (K)                    | 3.8         |
|                                                                                     | chlorine (Cl)                    | 2.6         |
|                                                                                     | sulfur (S)                       | 2.3         |
|                                                                                     | silica (Si)                      | 1.9         |
|                                                                                     | aluminum (Al)                    | 1.63        |
|                                                                                     | magnesium (Mg)                   | 1.5         |
|                                                                                     | manganese (Mn)                   | 0.4         |
|                                                                                     | sodium (Na)                      | 0.3         |
| <b>Gas chromatography–tandem mass spectrometry data (PAHs)</b>                      | phenanthrene                     | 11          |
|                                                                                     | fluoranthene                     | 12          |
|                                                                                     | pyrene                           | 10          |
|                                                                                     | benzo[ <i>a</i> ]anthracene      | 9           |
|                                                                                     | chrysene                         | 10          |
|                                                                                     | benzofluoranthenes               | 9           |
|                                                                                     | benzopyrenes                     | 13          |
|                                                                                     | indeno[1,2,3- <i>c,d</i> ]pyrene | 10          |
|                                                                                     | benzo[ <i>ghi</i> ]perylene      | 7           |
